# Supplementary material for: Fabrication of a novel bio-inspired collagen–polydopamine hydrogel and insights into the formation mechanism for biomedical applications
Source: Royal Society of Chemistry journal article supplement (doi:10.1039/c6ra12306f), 2016-01-01
Supplement: c6ra12306f1.pdf [file c6ra12306f1.pdf]

Electronic supplementary information (ESI) for RSC Advances  
This journal is © The Royal Society of Chemistry 2016

## Supporting Information

### **Fabrication of a novel bio-inspired collagen-polydopamine hydrogel and insights into the formation mechanism for biomedical applications**

Shichen Zhu, † <sup>a,b</sup> Zhipeng Gu, † <sup>c</sup> Shanbai Xiong, <sup>a,b</sup> Yueqi An, <sup>a</sup> Youming Liu, <sup>a</sup> Tao Yin, <sup>a</sup> Juan You, <sup>a</sup>

Yang Hu <sup>\*a,b</sup>

<sup>a</sup>. *College of Food Science and Technology and MOE Key Laboratory of Environment Correlative Dietology, Huazhong Agricultural University, Wuhan 430070, P. R. China.*

<sup>b</sup>. *Collaborative Innovation Center for Efficient and Health Production of Fisheries in Hunan Province, Changde 415000, P. R. China.*

<sup>c</sup>. *Department of Biomedical Engineering, School of Engineering, Sun Yat-sen University, Guangzhou 510006, P. R. China.*

† *Authors contributed equally.*

\*Corresponding authors: [huyang@mail.hzau.edu.cn](mailto:huyang@mail.hzau.edu.cn); Tel: +86-27-87288375

Table S1. The denaturation temperatures ( $T_d$ ) and endothermic peak areas (calorimetric enthalpy,  $\Delta H$ ) of all COL-PDA hydrogels with various concentrations of dopamine (a: 0 mg/ml; b: 0.5 mg/ml; c: 1 mg/ml; d: 2 mg/ml, e: 5 mg/ml and f: 10 mg/ml).

| Parameters       | a      | b      | c      | d      | e      | f     |
|------------------|--------|--------|--------|--------|--------|-------|
| $T_d$ (°C)       | 60.32  | 61.42  | 61.69  | 61.94  | 61.13  | 57.11 |
| $\Delta H$ (J/g) | 126.03 | 149.80 | 160.50 | 166.45 | 149.65 | 83.90 |
